# Supplementary material for: Time to Sputum Smear Conversion and Its Predictors Among Smear-Positive Pulmonary TB Patients in East Gojjam Zone, Northwest Ethiopia: A Longitudinal Study.
Source: Research Square preprint supplement (doi:10.21203/rs.3.rs-200228/v1), 2021-02-17
Supplement: Supplementary file 1 [file 2afcaef843bf80d28ed259cb.xlsx]

## Sheet: Sheet1
Time of Conversion	Proportion of Conversion
End of 1st month	0.6
End of 2nd months	0.85
End of 3rd months	0.92
End of 4th months	0.94
End of 5th months	0.95

## Sheet: Sheet2
Week	Conversion time	Mean	Median	IQR	N	Added
22	99	41.5	35		22	1
21	90			Q1	5.75	6th = 21
20	87			Q2	11.5	12th = 35
19	85			Q3	17.25	17th = 56
17	68			IQR	Q3 -Q1	17 -6 = 11th	35
18	56			Q2 = IQR = median
16	51			IQR =21 -56
15	48
14	43
13	40
11	37
12	33
10	30
9	28
8	25
7	23
6	21
5	16
4	13
3	10
2	8
1	5

## Sheet: Sheet4
week values		N	factor
5		22	1
8		Q1	5.75	6th = 19
10		Q2	11.5	12th = 35
13		Q3	17.25	17th = 68
16		IQR	#VALUE!	17 -6 = 11th	35
19		thus=	IQR = median	Q2	35	#NAME?
22
24
28
30
35
35
39
42
48
51
56
68
85
87
90
99

## Sheet: Sheet3
Calculating IQR
Q1=	22	6th =	21
	1
Q2	11.5	12th =	35
Q3		17th =	46
IQR	Q3 -Q1	17-6 =11th	35
thus	IQR = Q2	35

## Sheet: Sheet5
70
65
61
58
56
52
49
46
40
37
35
35
32
29
25
22
21
20
16
10
8
5
