# Supplementary material for: Time to Sputum Smear Conversion and Its Predictors Among Smear-Positive Pulmonary TB Patients in East Gojjam Zone, Northwest Ethiopia: A Longitudinal Study.
Source: Research Square preprint supplement (doi:10.21203/rs.3.rs-200228/v1), 2021-02-17
Supplement: Supplementary file 1 [file c05a7e4beca749ed524c54f1.docx]

Time to sputum smear conversion and its predictors among smear-positive pulmonary TB patients in East Gojjam Zone, Northwest Ethiopia: A longitudinal study.

Mulusew Andualem Asemahagn

S1 -Questionnaire for TB infectiousness after treatment initiation in East Gojjam, 2019.

S2 - data sets used to estimate median and inter quartile range of PTB sputum smear conversion time in East Gojjam Zone, 2019.
